# Supplementary material
Source: publisher site journal article supplement (https://www.spandidos-publications.com/5053/downloadSupplementary)
Supplement: Supplementary file 1 [file downloadSupplementary]

## Sheet: Supplementary S1
Table SI. DECIPHER analysis reveals 81 OMIM genes at the region 3q13.13q21.2.
Gene	Location	pLI	%HI
ZNF80	3:114234631-114237578	-	92.45
TUSC7	3:116709235-116723581	-	-
KALRN	3:124033369-124726325	1	10.98
ADCY5	3:123282296-123449090	1	11.41
KPNA1	3:122421902-122514945	1	11.62
STXBP5L	3:120908072-121424761	1	20.26
ARHGAP31	3:119294383-119420714	1	37.14
USF3	3:113648385-113696646	1	-
LSAMP	3:115802363-117139389	0.99	0.16
ZBTB20	3:114314500-115147288	0.97	0.19
CD86	3:122055362-122121139	0.95	64.85
GSK3B	3:119821321-120094994	0.92	0.69
CD200	3:112332347-112362812	0.92	65.55
NECTIN3	3:111070071-111275563	0.92	-
GTF2E1	3:120742637-120783069	0.89	9.99
FSTL1	3:120392293-120450993	0.89	10.58
ATP6V1A	3:113747033-113812056	0.87	11.97
NAA50	3:113716458-113746300	0.73	1.05
GAP43	3:115623510-115721490	0.63	19.61
COX17	3:119654513-119677454	0.2	27.91
TAGLN3	3:111998739-112013887	0.18	18.28
GCSAM	3:112120839-112133270	0.07	89.94
HACD2	3:123490820-123585053	0.07	-
CASR	3:122183668-122291629	0.05	3.37
TIGIT	3:114276913-114310288	0.02	81.74
BTLA	3:112463966-112499472	0.02	88.5
NDUFB4	3:120596328-120602507	0.01	65.08
PARP14	3:122680839-122730840	0.01	85.25
CD80	3:119524293-119559614	0.01	87.56
RABL3	3:120684938-120742993	0	12.21
DRD3	3:114127580-114199407	0	12.3
ATG3	3:112532510-112562046	0	15.59
MYLK	3:123610049-123884332	0	15.69
HGD	3:120628172-120682269	0	17.14
POGLUT1	3:119468963-119494708	0	20.35
PLCXD2	3:111674676-111846447	0	20.73
SEC22A	3:123201927-123274136	0	21.1
IQCB1	3:121769761-121835079	0	22.44
PDIA5	3:123067025-123225227	0	27.58
PHLDB2	3:111732497-111976517	0	31.66
CCDC80	3:112596797-112649530	0	32.17
SIDT1	3:113532555-113629575	0	35.04
SEMA5B	3:122909082-123028605	0	38.18
IGSF11	3:118900557-119146068	0	38.63
UPK1B	3:119173517-119205143	0	41.67
FBXO40	3:121593379-121630295	0	42.03
HCLS1	3:121631399-121660927	0	42.41
ZDHHC23	3:113947901-113965401	0	44.98
SLC15A2	3:121894401-121944188	0	45.85
NR1I2	3:119780484-119818487	0	48.5
POLQ	3:121431431-121545988	0	48.71
SPICE1	3:113442718-113515187	0	52.14
ADPRH	3:119579268-119589945	0	53.39
EAF2	3:121835183-121886526	0	55.6
ILDR1	3:121987323-122022247	0	57.36
BOC	3:113211003-113287459	0	58.16
FAM162A	3:122384161-122412334	0	59.58
B4GALT4	3:119211732-119240946	0	59.93
ROPN1	3:123968521-123992178	0	60.7
GOLGB1	3:121663199-121749755	0	61.09
HSPBAP1	3:122739999-122793831	0	61.26
ABHD10	3:111979010-111993368	0	62.42
POPDC2	3:119636457-119665324	0	65.11
GPR156	3:120164645-120285222	0	65.88
PLA1A	3:119597875-119629811	0	66.32
CCDC14	3:123897305-123961408	0	72.95
TIMMDC1	3:119498547-119525090	0	73.59
CD96	3:111292719-111665750	0	74.03
CSTA	3:122325248-122341969	0	76.56
SLC9C1	3:112140898-112294227	0	78.52
ZBED2	3:111592900-111595346	0	83.96
DTX3L	3:122564338-122575203	0	86.37
PARP9	3:122527924-122564577	0	87.26
C3orf52	3:112086335-112131004	0	87.92
PARP15	3:122577628-122639047	0	90.57
ARGFX	3:121567949-121590622	0	91.41
CD200R1	3:112921205-112975103	0	92.09
NEPRO	3:113002444-113019861	0	-
SLC49A4	3:122795069-122881139	0	-
CFAP91	3:119703022-119767102	0	-
CFAP44	3:113286930-113441610	0	-
